# Supplementary material for: Role of mechanochemical synthesis in the crystal chemistry of leflunomide
Source: Royal Society of Chemistry journal article supplement (doi:10.1039/d3ce00373f), 2023-01-01
Supplement: d3ce00373f1.pdf [file d3ce00373f1.pdf]

## **Electronic Supporting Information**

### **Role of Mechanochemical Synthesis in the Crystal Chemistry of Leflunomide**

*Vishal Lohar<sup>a#</sup>, Anila M. Menon<sup>a#</sup>, Ajay Suresh<sup>a</sup>, Deepak Chopra<sup>a\*</sup>*

*<sup>a</sup> Crystallography and Crystal Chemistry Laboratory, Department of Chemistry, Indian Institute of Science Education and Research Bhopal, Bhopal Bypass Road, Bhauri, Bhopal 462066, Madhya Pradesh, India.*

*#: Equal contribution of both the authors*

### **List of Contents**

- A) List of pharmaceutical additives and crystallization table**
- B) PXRD patterns of reactants with their polymorphs**
- C) Thermal characterization via DSC curves**
- D) Reciprocal lattice images for the LF\_DMSO crystal**
- E)  $d_{norm}$  plotted over Hirshfeld Surface**
- F) Analysis of Fingerprint Plots**
- G) Cluster Energy Framework and Interaction Energy Calculations**

## A) List of Pharmaceutical Additives and Crystallization Table

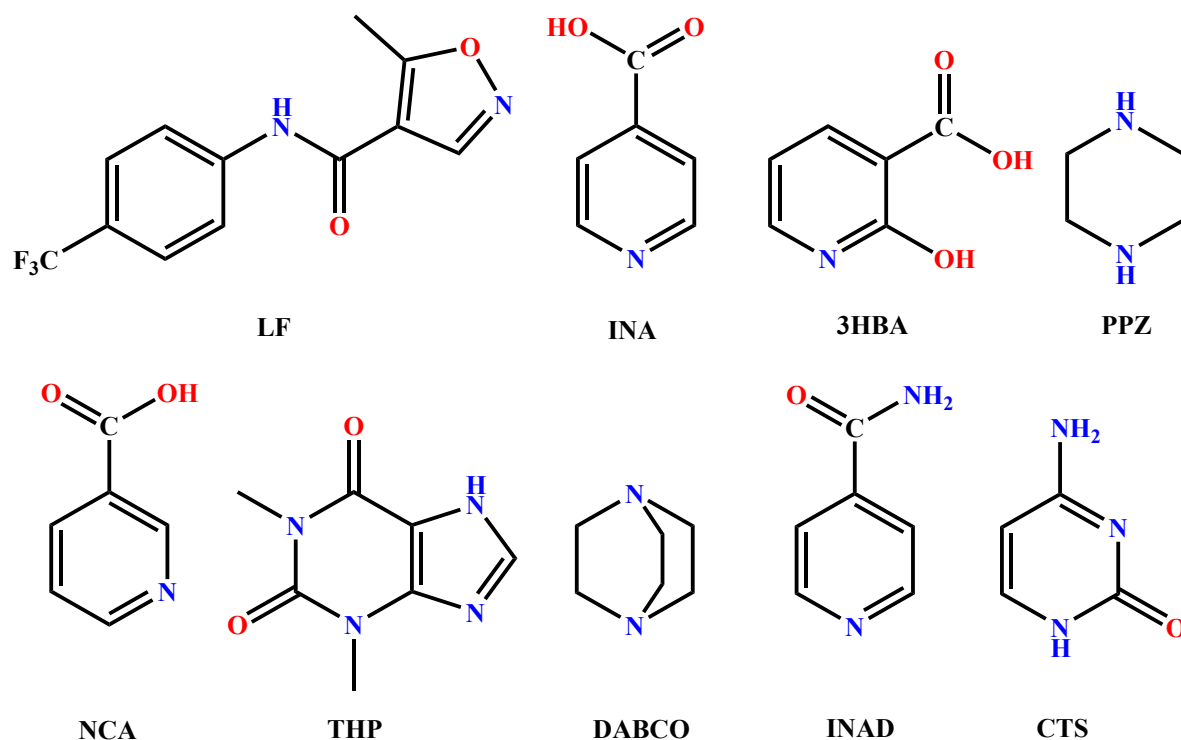

**Figure S1:** Chemical structures of LF drug and list of additives used for mechanochemical LAG experiments.

**Table S1:** Observed crystals with their morphologies. (DMSO: Dimethyl sulphoxide, IPA: Isopropyl alcohol, MeOH: Methanol, EtOH: Ethanol, DEE: Diethyl ether, THF: Tetrahydrofuran, TFT: Trifluorotoluene, MeOAc: Methyl acetate, EtOAc: Ethyl acetate, DCM: Dichloromethane, etc.)

| <b>Leflunomide: Isonicotinic Acid (1:1)</b>                   |                                 |                  |                   |                 |
|---------------------------------------------------------------|---------------------------------|------------------|-------------------|-----------------|
| <b>Solvent</b>                                                | <b>Solubility</b>               | <b>Condition</b> | <b>Morphology</b> | <b>Result</b>   |
| Methanol                                                      | Soluble                         | LT               | Plate             | LF_I & LF_II    |
| Ethanol                                                       | Soluble                         | LT               | Plate             | LF_I            |
| DCM                                                           | Soluble                         | LT               | Aggregate         | -               |
| Chloroform                                                    | Sonicate <sup>n</sup> → Filter  | LT               | Aggregate         | -               |
| IPA                                                           | Sonicate <sup>n</sup> → Soluble | LT               | Plate             | LF_I & LF_II    |
| DMSO                                                          | Soluble                         | LT               | Plate             | Solvate         |
| Acetone + IPA                                                 | Sonicate <sup>n</sup> → Soluble | LT               | Plate             | LF_I & LF_II    |
| <b>Leflunomide: 2-Hydroxypyridine-3-Carboxylic Acid (1:1)</b> |                                 |                  |                   |                 |
| Methanol                                                      | Soluble                         | LT               | Plate             | LF_I            |
| Ethanol                                                       | Soluble                         | LT               | Plate             | LF_I & LF_II    |
| Acetonitrile                                                  | Soluble                         | LT               | Aggregate         | -               |
| DMSO                                                          | Soluble                         | LT               | Plate             | Solvate         |
| IPA                                                           | Soluble                         | LT               | Plate             | LF_I & LF_II    |
| DEE + Acetone                                                 | Soluble                         | LT               | Aggregate         | -               |
| <b>Leflunomide: Nicotinic Acid (1:1)</b>                      |                                 |                  |                   |                 |
| Methanol                                                      | Soluble                         | LT               | Plate             | LF_II           |
| Ethanol                                                       | Soluble                         | LT               | Plate             | LF_I & LF_II    |
| IPA                                                           | Soluble                         | LT               | Plate + Needle    | LF_I + Additive |
| DMSO                                                          | Soluble                         | LT               | Plate             | Solvate         |

|                                                                            |             |    |                |                  |
|----------------------------------------------------------------------------|-------------|----|----------------|------------------|
| Toluene                                                                    | Soluble     | LT | Plate          | LF_II            |
| Acetonitrile                                                               | Soluble     | LT | Aggregate      | -                |
| <b>Leflunomide: Theophylline (1:1)</b>                                     |             |    |                |                  |
| Methanol                                                                   | Soluble     | LT | Plate          | LF_I             |
| Ethanol                                                                    | Soluble     | LT | Plate          | LF_I & LF_II     |
| DMSO                                                                       | Soluble     | LT | Plate          | Solvate          |
| TFT                                                                        | Soluble     | LT | Plate          | LF_II            |
| Acetonitrile                                                               | Soluble     | LT | Aggregate      | -                |
| Hexane                                                                     | Soluble     | LT | Plate          | LF_II            |
| <b>Leflunomide: Piperazine (1:1) → TF<sup>-</sup> PPZ<sup>+</sup> Salt</b> |             |    |                |                  |
| Methanol                                                                   | Soluble     | LT | Plate          | Salt             |
| Isopropanol                                                                | Soluble     | LT | Aggregate      | -                |
| Acetonitrile                                                               | Soluble     | LT | Block          | Salt             |
| DMSO                                                                       | Soluble     | LT | Aggregate      | -                |
| Nitromethane                                                               | Soluble     | LT | Block          | Salt             |
| THF                                                                        | Soluble     | LT | Aggregate      | -                |
| <b>Leflunomide: DABCO (1:1)</b>                                            |             |    |                |                  |
| IPA                                                                        | Soluble     | LT | Plate          | LF_I & LF_II     |
| Acetone                                                                    | Soluble     | LT | Plate          | LF_II            |
| Ethanol                                                                    | Soluble     | LT | Aggregate      | -                |
| Methanol                                                                   | Soluble     | LT | Aggregate      | -                |
| DMSO                                                                       | Soluble     | LT | Plate          | Solvate          |
| Acetonitrile                                                               | Soluble     | LT | Aggregate      | -                |
| <b>Leflunomide: Isonicotinamide (1:1)</b>                                  |             |    |                |                  |
| MeOH                                                                       | Soluble     | LT | Block          | LF_I             |
| Acetonitrile                                                               | Soluble     | LT | Needle         |                  |
| EtOAc                                                                      | Soluble     | LT | Needle         |                  |
| MeOAc                                                                      | Soluble     | LT | Needle         |                  |
| Nitromethane                                                               | Soluble     | LT | Needle + Plate |                  |
| Isopropanol                                                                | Soluble     | LT | Block          |                  |
| DCM                                                                        | Soluble     | LT | Needle + Block | LF_II + Additive |
| Butan-2-one                                                                | Soluble     | LT | Aggregate      | -                |
| 1,4-Dioxane                                                                | Soluble     | LT | Block          | LF_II            |
| <b>Leflunomide: Cytosine (1:1)</b>                                         |             |    |                |                  |
| MeOH                                                                       | Soluble     | LT | Aggregate      | -                |
| DCM + Methanol                                                             | Δ → Soluble | LT | Aggregate      |                  |
| ACN + MeOH                                                                 | Δ → Soluble | LT | Aggregate      |                  |
| Nitromethane + MeOH                                                        | Δ → Soluble | LT | Aggregate      |                  |
| EtOAc + MeOH                                                               | Δ → Soluble | LT | Aggregate      |                  |
| MeOAc + MeOH                                                               | Δ → Soluble | LT | Aggregate      |                  |
| Isopropanol + MeOH                                                         | Δ → Soluble | LT | Aggregate      |                  |
| 1,4-Dioxane + MeOH                                                         | Δ → Soluble | LT | Aggregate      |                  |
| Acetone + MeOH                                                             | Δ → Soluble | LT | Aggregate      |                  |

**Table S2:** Chemical structures of the solid-state forms LF-DMSO and TF<sup>-</sup>\_PPZ<sup>+</sup>.

| Sample Code                                     | API                                                                               |                                                                                                        |
|-------------------------------------------------|-----------------------------------------------------------------------------------|--------------------------------------------------------------------------------------------------------|
| <b>LF-DMSO</b><br>(Solvate)                     | 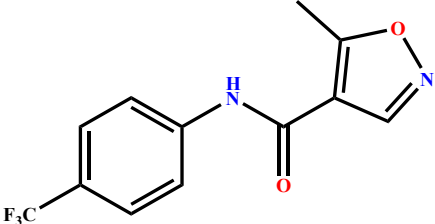 | <b>Solvent</b><br>  |
| <b>TF<sup>-</sup>_PPZ<sup>+</sup></b><br>(Salt) |  | <b>Additive</b><br> |

## B) PXRD Patterns of Reactants with their Polymorphs

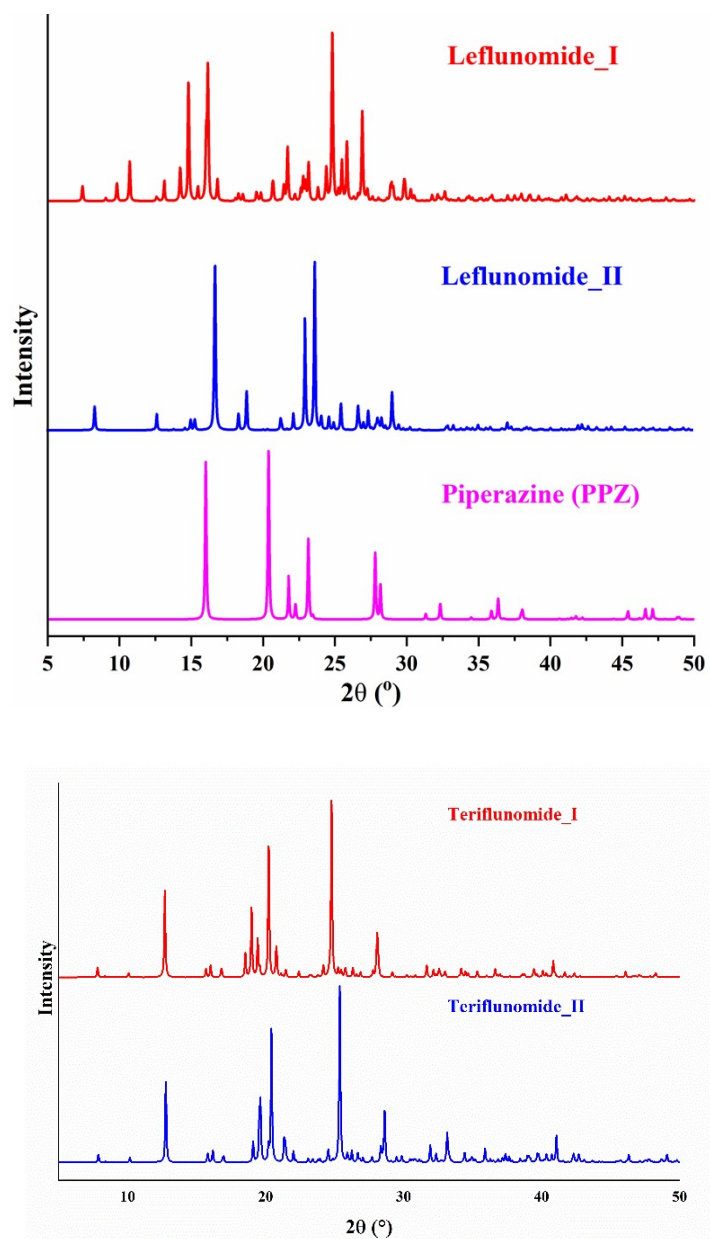

**Figure S2:** PXRD peak patterns of LF\_I, LF\_II, PPZ, TF\_I and TF\_II.

### C) Thermal Characterization via DSC Curves

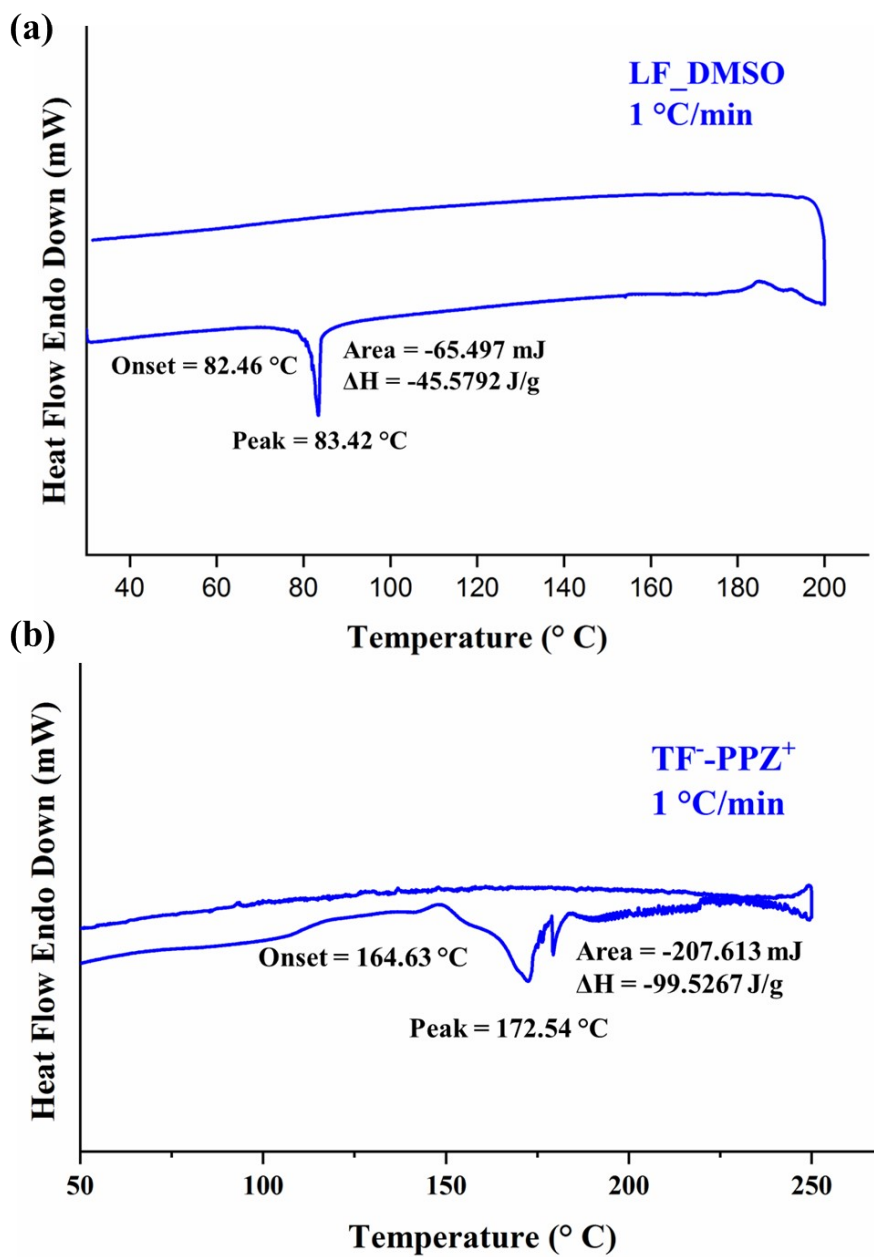

Figure S3: DSC trace for (a) LF\_DMSO solvate and (b) TF - \_PPZ + salt crystals.

#### D) Reciprocal Lattice Images for the LF\_DMSO Crystal

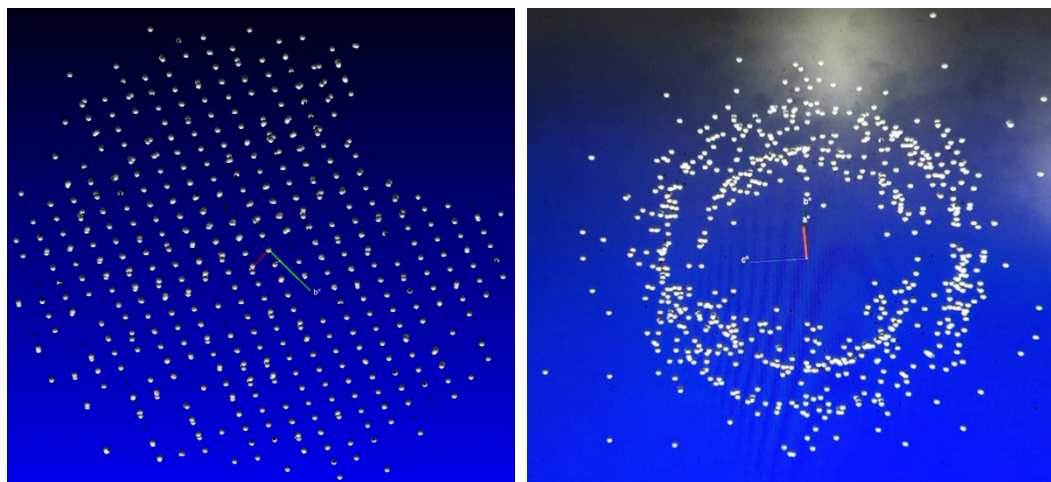

**Figure S4:** Gradual deviation of LF\_DMSO solvate crystals from crystalline to amorphous nature shown by the SCXRD reciprocal lattice images, obtained by increasing the temperature.

**E)  $d_{norm}$  Plotted over Hirshfeld Surface**

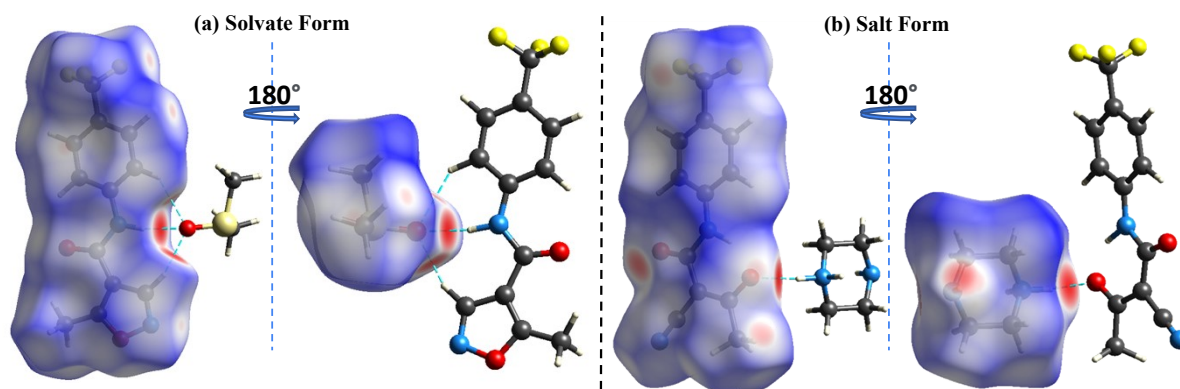

**Figure S5:** Hirshfeld surfaces of (a) solvate mapped with  $d_{norm}$  (left: Drug LF, right: DMSO); (b) salt mapped with  $d_{norm}$  (left: Drug TF<sup>-</sup>, right: PPZ<sup>+</sup>).



## F) Analysis of Fingerprint Plots

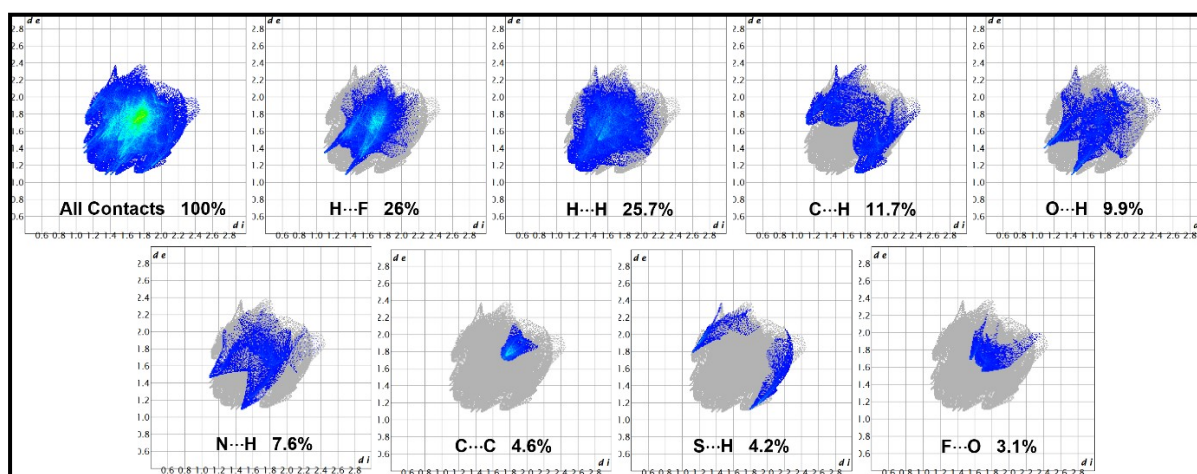

Figure S6: Fingerprint plots of LF\_DMSO solvate showing the interaction type and percentage contribution to the crystal lattice.

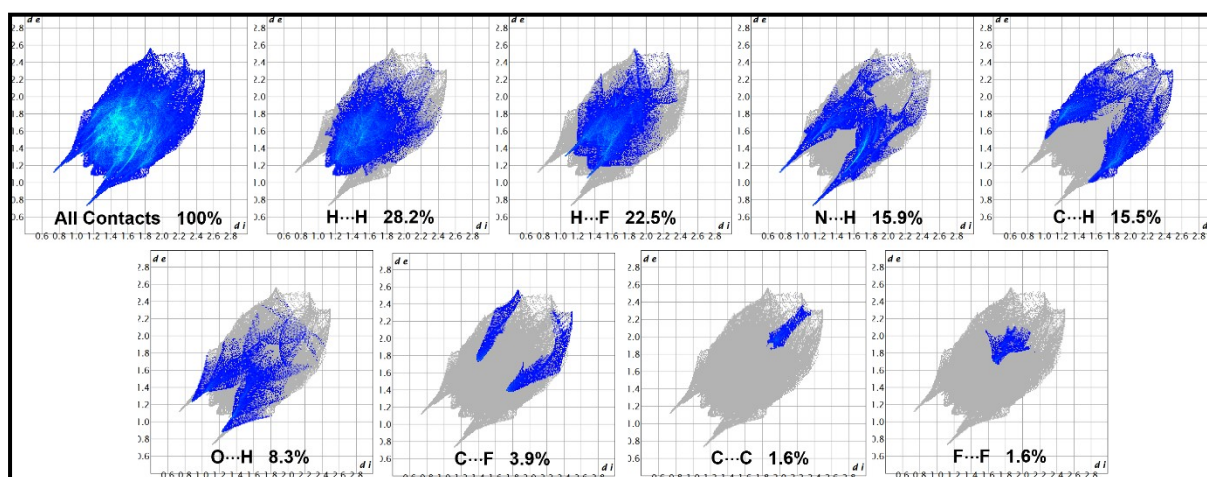

Figure S7: Fingerprint plots of TF\_PPZ<sup>+</sup> salt showing the interaction type and percentage contribution to the crystal lattice.

## G) Cluster Energy Framework and Interaction Energy Calculations

**Table S3:** Results from Energy Frameworks for LF\_DMSO.

Interaction Energies (kJ/mol)  
R is the distance between molecular centroids (mean atomic position) in Å.

Total energies, only reported for two benchmarked energy models, are the sum of the four energy components, scaled appropriately (see the scale factor table below)

---

|  | N | Symop      | R     | Electron Density | E_ele | E_pol | E_dis | E_rep | E_tot |
|--|---|------------|-------|------------------|-------|-------|-------|-------|-------|
|  | 1 | -          | 4.56  | B3LYP/6-31G(d,p) | -11.1 | -1.5  | -17.7 | 9.3   | -22.4 |
|  | 1 | -x, -y, -z | 6.30  | B3LYP/6-31G(d,p) | 4.9   | -1.5  | -25.6 | 13.8  | -9.7  |
|  | 1 | -          | 7.69  | B3LYP/6-31G(d,p) | -11.1 | -2.9  | -12.0 | 14.5  | -15.4 |
|  | 2 | x, y, z    | 12.42 | B3LYP/6-31G(d,p) | 2.1   | -0.4  | -7.0  | 0.0   | -4.1  |
|  | 1 | -x, -y, -z | 13.98 | B3LYP/6-31G(d,p) | 1.5   | -1.5  | -12.2 | 0.0   | -10.2 |
|  | 1 | -x, -y, -z | 13.11 | B3LYP/6-31G(d,p) | 1.0   | -0.1  | -1.8  | 0.0   | -0.6  |
|  | 1 | -          | 9.73  | B3LYP/6-31G(d,p) | -3.1  | -0.3  | -7.5  | 3.6   | -7.9  |
|  | 1 | -x, -y, -z | 5.74  | B3LYP/6-31G(d,p) | -11.6 | -1.0  | -26.6 | 13.9  | -27.6 |
|  | 1 | -          | 5.35  | B3LYP/6-31G(d,p) | -4.4  | -1.5  | -12.0 | 9.8   | -10.2 |
|  | 1 | -          | 5.32  | B3LYP/6-31G(d,p) | -5.7  | -1.0  | -20.4 | 17.4  | -13.7 |
|  | 1 | -          | 10.35 | B3LYP/6-31G(d,p) | 1.9   | -0.4  | -3.3  | 1.5   | -0.2  |
|  | 1 | -x, -y, -z | 10.15 | B3LYP/6-31G(d,p) | -7.8  | -0.9  | -11.0 | 8.5   | -13.2 |
|  | 2 | x, y, z    | 12.31 | B3LYP/6-31G(d,p) | 0.2   | -0.3  | -3.8  | 0.0   | -3.3  |
|  | 1 | -          | 4.83  | B3LYP/6-31G(d,p) | -60.5 | -17.5 | -18.4 | 58.8  | -56.5 |
|  | 1 | -x, -y, -z | 4.07  | B3LYP/6-31G(d,p) | -9.9  | -2.5  | -80.4 | 44.5  | -54.8 |
|  | 1 | -x, -y, -z | 13.94 | B3LYP/6-31G(d,p) | 0.6   | -0.1  | -1.3  | 0.0   | -0.6  |
|  | 1 | -          | 6.36  | B3LYP/6-31G(d,p) | -3.7  | -0.5  | -9.1  | 6.9   | -8.0  |

---

Scale factors for benchmarked energy models  
See Mackenzie et al. IUCrJ (2017)

---

| Energy Model                                     | k_ele | k_pol | k_disp | k_rep |
|--------------------------------------------------|-------|-------|--------|-------|
| CE-HF ... HF/3-21G electron densities            | 1.019 | 0.651 | 0.901  | 0.811 |
| CE-B3LYP ... B3LYP/6-31G(d,p) electron densities | 1.057 | 0.740 | 0.871  | 0.618 |

**Table S4:** Results from Energy Framework for TF<sup>-</sup>PPZ<sup>+</sup>

-----

Interaction Energies (kJ/mol)  
R is the distance between molecular centroids (mean atomic position) in Å.

Total energies, only reported for two benchmarked energy models, are the sum of the four energy components, scaled appropriately (see the scale factor table below)

-----

|  | N | Symop             | R     | Electron Density | E_ele  | E_pol | E_dis | E_rep | E_tot  |
|--|---|-------------------|-------|------------------|--------|-------|-------|-------|--------|
|  | 2 | -x, y+1/2, -z+1/2 | 7.95  | B3LYP/6-31G(d,p) | 130.6  | 0.0   | -18.8 | 13.1  | 129.7  |
|  | 1 | -                 | 6.17  | B3LYP/6-31G(d,p) | -285.8 | -3.5  | -19.2 | 43.7  | -294.5 |
|  | 1 | -x, -y, -z        | 13.53 | B3LYP/6-31G(d,p) | 0.0    | -29.9 | 0.0   | 0.0   | -22.1  |
|  | 2 | x+1/2, -y+1/2, -z | 14.20 | B3LYP/6-31G(d,p) | 150.7  | -9.6  | -2.8  | 0.0   | 149.8  |
|  | 2 | x+1/2, y, -z+1/2  | 8.34  | B3LYP/6-31G(d,p) | 120.7  | 0.0   | -15.5 | 7.5   | 118.7  |
|  | 1 | -                 | 6.32  | B3LYP/6-31G(d,p) | -104.4 | -0.9  | -0.0  | 0.0   | -111.1 |
|  | 1 | -                 | 5.19  | B3LYP/6-31G(d,p) | -142.5 | -7.7  | -0.7  | 0.0   | -157.0 |
|  | 1 | -                 | 10.03 | B3LYP/6-31G(d,p) | -124.3 | -1.7  | -0.1  | 0.0   | -132.7 |
|  | 1 | -                 | 9.39  | B3LYP/6-31G(d,p) | -100.1 | -1.2  | -0.1  | 0.0   | -106.9 |
|  | 2 | -x+1/2, y+1/2, z  | 4.62  | B3LYP/6-31G(d,p) | 198.8  | -25.5 | -47.1 | 34.1  | 171.3  |
|  | 1 | -                 | 6.20  | B3LYP/6-31G(d,p) | -275.2 | -45.5 | -30.2 | 28.7  | -333.1 |
|  | 1 | -                 | 10.76 | B3LYP/6-31G(d,p) | -102.8 | -1.1  | -0.1  | 0.0   | -109.6 |
|  | 1 | -                 | 10.21 | B3LYP/6-31G(d,p) | -78.6  | -0.5  | -0.0  | 0.0   | -83.4  |
|  | 0 | -x+1/2, y+1/2, z  | 4.70  | B3LYP/6-31G(d,p) | 76.1   | -0.2  | -0.0  | 0.0   | 80.3   |

-----

Scale factors for benchmarked energy models  
See Mackenzie et al. IUCrJ (2017)

-----

| Energy Model                                     | k_ele | k_pol | k_disp | k_rep |
|--------------------------------------------------|-------|-------|--------|-------|
| CE-HF ... HF/3-21G electron densities            | 1.019 | 0.651 | 0.901  | 0.811 |
| CE-B3LYP ... B3LYP/6-31G(d,p) electron densities | 1.057 | 0.740 | 0.871  | 0.618 |

-----
